# Supplementary material
Source: MDPI journal article supplement (https://www.mdpi.com/2504-3129/3/1/10)
Supplement: s1 [file s1]

# Effects of Drainage Water Management in a Corn–Soy Rotation on Soil N<sub>2</sub>O and CH<sub>4</sub> Fluxes

Jacob G. Hagedorn <sup>1,2,\*</sup>, Eric A. Davidson <sup>1</sup>, Thomas R. Fisher <sup>3</sup>, Rebecca J. Fox <sup>3,4</sup>, Qiurui Zhu <sup>1</sup>, Anne B. Gustafson <sup>3</sup>, Erika Koontz <sup>3,5</sup>, Mark S. Castro <sup>1</sup> and James Lewis <sup>6</sup>

<sup>1</sup> Appalachian Laboratory, University of Maryland Center for Environmental Science; edavidson@umces.edu (E.A.D.); qzhu@umces.edu (Q.Z.); mcastro@umces.edu (M.S.C.); jhagedorn@umces.edu (J.G.H.)

<sup>2</sup> University of North Carolina at Asheville. Environmental Studies Dept. Asheville, NC, USA; jghagedo@unca.edu (J.G.H.)

<sup>3</sup> Horn Point Laboratory, University of Maryland Center for Environmental Science; fisher@umces.edu (T.R.F.); rfox3@washcoll.edu (R.J.F.); abgust@umces.edu (A.B.G.); erika.koontz@gmail.com (E.K.)

<sup>4</sup> Washington College. Environmental Science and Studies Dept. Chestertown, MD, USA; rfox3@washcoll.edu (R.J.F.)

<sup>5</sup> Smithsonian Environmental Research Center, Edgewater, MD, USA; erika.koontz@gmail.com (E.K.)

<sup>6</sup> University of Maryland Extension Caroline County, Denton, MD, USA; jlewis2@umd.edu (J.L.)

\* Correspondence: jghagedo@unca.edu

**Table S1.** Details of specific periods used to calculate the seasonally based annual N<sub>2</sub>O estimates each year by treatment. Mean  $\pm$  95% CI reported.

| Period Start                | Period End | # days | # obs | Mean or Decay Function | Non-DWM (kg N <sub>2</sub> O-N ha <sup>-1</sup> period <sup>-1</sup> ) | DWM (kg N <sub>2</sub> O-N ha <sup>-1</sup> period <sup>-1</sup> ) |
|-----------------------------|------------|--------|-------|------------------------|------------------------------------------------------------------------|--------------------------------------------------------------------|
| 2017 Corn                   |            |        |       |                        |                                                                        |                                                                    |
| 1/1/17                      | 4/27/17    | 116    | 3     | Mean                   | 0.4 $\pm$ 0.3                                                          | 0.7 $\pm$ 0.7                                                      |
| 4/27/17                     | 6/5/17     | 39     | 3     | Mean                   | 1.0 $\pm$ 1.0                                                          | 2.3 $\pm$ 1.1                                                      |
| 6/5/17                      | 8/10/17    | 66     | 4     | Decay                  | 2.0 $\pm$ 0.9                                                          | 2.5 $\pm$ 1.4                                                      |
| 8/10/17                     | 1/1/18     | 144    | 4     | Mean                   | 0.9 $\pm$ 0.6                                                          | 0.9 $\pm$ 0.7                                                      |
| <b>2017 Annual Estimate</b> |            |        |       |                        | <b>4.3 <math>\pm</math> 0.8</b>                                        | <b>6.4 <math>\pm</math> 1.1</b>                                    |
| 2018 Soybean                |            |        |       |                        |                                                                        |                                                                    |
| 1/1/18                      | 5/14/18    | 133    | 2     | Mean                   | 0.7 $\pm$ 0.5                                                          | 0.9 $\pm$ 0.6                                                      |
| 5/14/18                     | 7/11/18    | 58     | 3     | Decay                  | 0.5 $\pm$ 0.2                                                          | 0.4 $\pm$ 0.1                                                      |
| 7/11/18                     | 1/1/19     | 174    | 2     | Mean                   | 0.0 $\pm$ 0.1                                                          | 0.9 $\pm$ 0.4                                                      |
| <b>2018 Annual Estimate</b> |            |        |       |                        | <b>1.2 <math>\pm</math> 0.3</b>                                        | <b>2.1 <math>\pm</math> 0.3</b>                                    |
| 2019 Corn                   |            |        |       |                        |                                                                        |                                                                    |
| 1/1/19                      | 4/26/19    | 115    | 3     | Mean                   | 0.3 $\pm$ 0.2                                                          | 0.8 $\pm$ 0.4                                                      |
| 4/26/19                     | 6/17/19    | 52     | 3     | Decay                  | 3.7 $\pm$ 2.5                                                          | 4.7 $\pm$ 2.1                                                      |
| 6/17/19                     | 1/1/20     | 198    | 4-5   | Decay                  | 3.2 $\pm$ 4.4                                                          | 2.3 $\pm$ 1.2                                                      |
| <b>2019 Annual Estimate</b> |            |        |       |                        | <b>7.2 <math>\pm</math> 3.5</b>                                        | <b>7.7 <math>\pm</math> 1.4</b>                                    |

**Table S2.** The season period boundaries used for the CH<sub>4</sub> seasonally-based annual flux estimate. Mean  $\pm$  SE.

| Period Start                | Period End | # days | # flux observations | DWM (CH <sub>4</sub> -C kg ha <sup>-1</sup> period <sup>-1</sup> ) | Non- DWM (CH <sub>4</sub> -C kg ha <sup>-1</sup> period <sup>-1</sup> ) |
|-----------------------------|------------|--------|---------------------|--------------------------------------------------------------------|-------------------------------------------------------------------------|
| 1/1/17                      | 4/26/17    | 115    | 2                   | 0.01 $\pm$ 0.01                                                    | 0.02 $\pm$ 0.03                                                         |
| 4/26/17                     | 7/15/17    | 80     | 6                   | 0.08 $\pm$ 0.09                                                    | 0.10 $\pm$ 0.11                                                         |
| 7/15/17                     | 1/1/18     | 170    | 5                   | 0.09 $\pm$ 0.13                                                    | 0.06 $\pm$ 0.07                                                         |
| <b>2017 Annual Estimate</b> |            |        |                     | <b>0.18 <math>\pm</math> 0.10</b>                                  | <b>0.19 <math>\pm</math> 0.06</b>                                       |

|                             |         |     |   |                    |                    |
|-----------------------------|---------|-----|---|--------------------|--------------------|
| 1/1/17                      | 4/26/17 | 115 | 2 | 0.01 ± 0.03        | 0.03 ± 0.03        |
| 4/26/17                     | 7/15/17 | 80  | 4 | 0.15 ± 0.18        | 0.09 ± 0.07        |
| 7/15/17                     | 1/1/18  | 170 | 2 | 0.01 ± 0.03        | 0.04 ± 0.10        |
| <b>2018 Annual Estimate</b> |         |     |   | <b>0.17 ± 0.15</b> | <b>0.15 ± 0.06</b> |
| 1/1/17                      | 4/26/17 | 115 | 2 | 0.01 ± 0.03        | 0.03 ± 0.04        |
| 4/26/17                     | 7/15/17 | 80  | 5 | 0.29 ± 0.84        | 0.08 ± 0.10        |
| 7/15/17                     | 1/1/18  | 170 | 3 | 0.02 ± 0.10        | 0.31 ± 0.23        |
| <b>2019 Annual Estimate</b> |         |     |   | <b>0.56 ± 0.73</b> | <b>0.42 ± 0.12</b> |

**Table S3.** USDA soil textural class description as derived from sand, silt, and clay fractions obtained by hydrometer method for each study plot.

| <b>Study Plot</b> |                 |                 |                 |                 |
|-------------------|-----------------|-----------------|-----------------|-----------------|
| <b>Depth (cm)</b> | <b>Non-DWM</b>  |                 | <b>DWM</b>      |                 |
|                   | <b>A</b>        | <b>B</b>        | <b>C</b>        | <b>D</b>        |
| 0-10              | Loamy fine sand | loamy fine sand | loam            | sandy loam      |
| 10-20             | Loamy fine sand | loamy fine sand | loam            | sandy loam      |
| 20-30             | fine sand       | fine sand       | silty clay loam | sandy clay loam |
| 30-40             | fine sand       | fine sand       | silty clay loam | sandy loam      |
| 40-50             | fine sand       | fine sand       | silty clay loam | loamy fine sand |
| 50-60             | loamy fine sand | fine sand       | clay loam       | fine sand       |
| 60-70             | loamy fine sand | sandy clay loam | clay loam       | fine sand       |
| 70-80             | fine sand       | sandy loam      | loamy fine sand | loamy fine sand |
| 80-90             | fine sand       | sandy loam      | sandy loam      | loamy fine sand |
| 90-100            | sandy loam      | sandy loam      | fine sand       | loamy fine sand |

**Table S4.** %C, %N, and bulk density measurements (mean ± SD) at 5 cm depth. N = 40 for %C and %N. N= 4 for BD.

| <b>Study Plot</b>        |                  |             |             |             |
|--------------------------|------------------|-------------|-------------|-------------|
| <b>Variable</b>          | <b>Non - DWM</b> |             | <b>DWM</b>  |             |
|                          | <b>A</b>         | <b>B</b>    | <b>C</b>    | <b>D</b>    |
| %C                       | 1.37 ± 0.06      | 1.47 ± 0.07 | 2.17 ± 0.05 | 2.08 ± 0.07 |
| %N                       | 0.12 ± 0.01      | 0.13 ± 0.01 | 0.18 ± 0.00 | 0.17 ± 0.01 |
| BD (g cm <sup>-3</sup> ) | 1.13 ± 0.03      | 1.17 ± 0.01 | 1.05 ± 0.03 | 1.11 ± 0.04 |

**Table S5.** Summary of minimum detectable flux (MDF) calculation methodologies and resulting percentages of measured fluxes over the MDF. The two methods show that between 70 and 90% of the flux measurements were above the detection limit, which is in broad agreement with the percentage of concentration slopes that were significantly different from zero. Two methods were used to calculate the minimum detectable flux (MDF) of the chamber design. The first method adopted by [1] used calculated CH<sub>4</sub> and N<sub>2</sub>O fluxes binned at 0.01 ug m<sup>-2</sup> hr<sup>-1</sup> intervals and 95% confidence intervals of those fluxes. The lowest flux bin with at least 67% of the 95% confidence intervals of individual flux measurements not including zero was deemed the MDF. The second method is derived from [2] based on a method developed by [3] for use with small numbers of syringe samples but modified by [4] to account for the high frequency measurements of the Picarro G2308 instrument.

| <b>MDF Method (µg m<sup>-2</sup> hr<sup>-1</sup>)</b> |                          |                         |
|-------------------------------------------------------|--------------------------|-------------------------|
|                                                       | <b>Courtois 2019 [2]</b> | <b>Verchot 1999 [1]</b> |
| CH <sub>4</sub> -C MDF +/-                            | 0.21                     | 0.12                    |
| N <sub>2</sub> O-N MDF +/-                            | 1.2                      | 2.5                     |
| CH <sub>4</sub> -C >  MDF                             | 83%                      | 92%                     |
| N <sub>2</sub> O-N >  MDF                             | 92%                      | 84%                     |

**Table S6.** Summary of multiple linear regression results of  $\ln N_2O$  flux data, showing the coefficients (columns) of the independent model variables. The full model had a residual standard error of 0.644 on 531 degrees of freedom with an  $r^2 = 0.23$  and a p-value  $<0.001$ . The full model described by equation 2 in the main text is listed above the table below.

$$\ln (N_2O + 1) = (0.029 * NO_3N) + (0.021 * \text{soil temp}) + (0.056 * WFPS) - (0.001 * WFPS^2) - 1.37$$

| Variable  | Estimate | Std. Error | P-value |
|-----------|----------|------------|---------|
| Intercept | -1.37    | 0.2150     | <0.001  |
| $NO_3-N$  | 0.029    | 0.0031     | <0.001  |
| Soil Temp | 0.021    | 0.0041     | <0.001  |
| WFPS      | 0.056    | 0.0097     | <0.001  |
| $WFPS^2$  | -0.001   | 0.0001     | <0.001  |

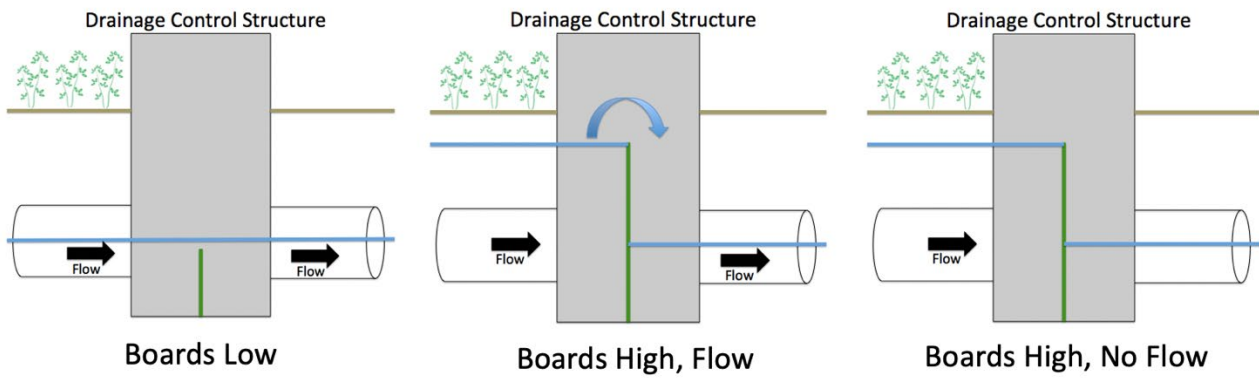

**Figure S1.** Detail of cross-section of drainage control structures that implements DWM. Low board and high board (green) conditions as well as theoretical water tables (blue).

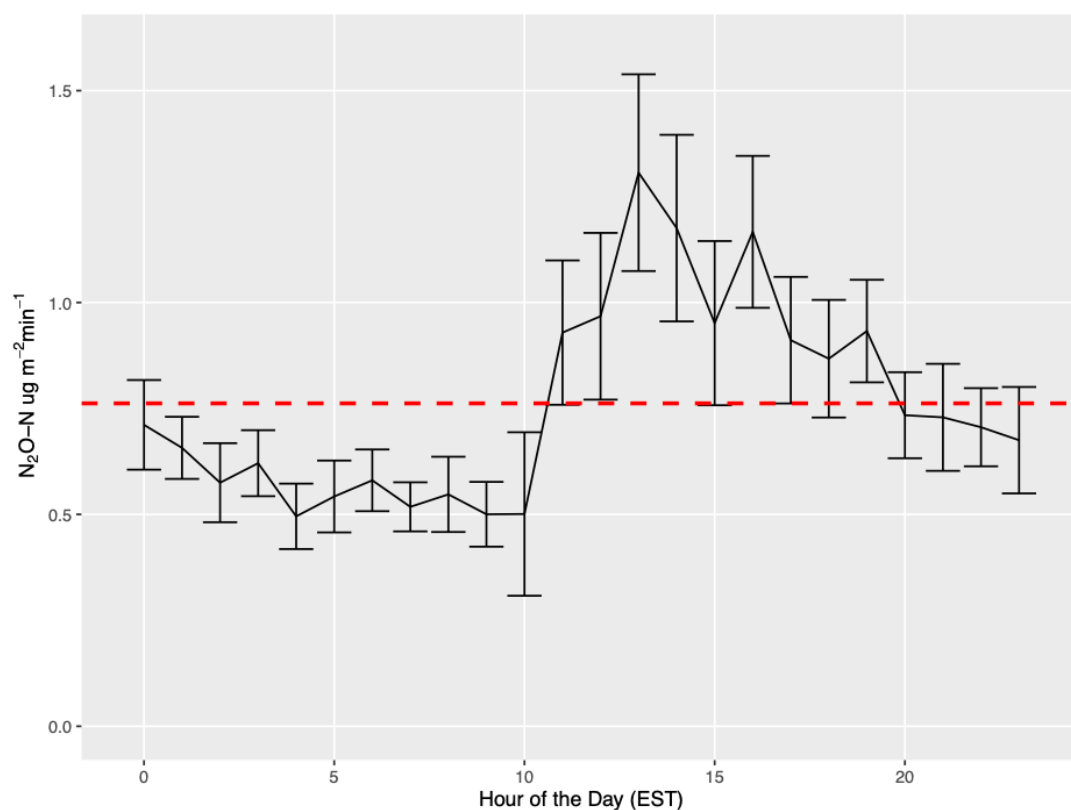

**Figure S2.** Summary of diel variation of N<sub>2</sub>O fluxes in a preliminary sampling campaign from 05/19/2019 to 05/22/2019 using an Eosense automated chamber. Each point is a mean ( $\pm$  SE error bar) from four chambers over four days for each hour of the day. This period did not include precipitation or N fertilization events. The red dashed line represents the mean flux of all chambers over the entire 4-day period.

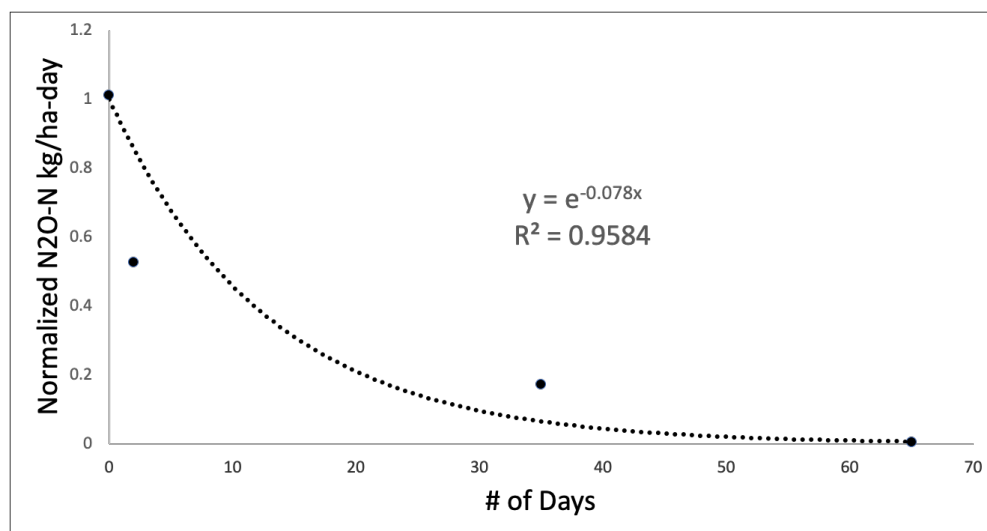

**Figure S3.** Demonstration of decay curve fit to a particular period of time after N fertilization to estimate annual N<sub>2</sub>O fluxes.

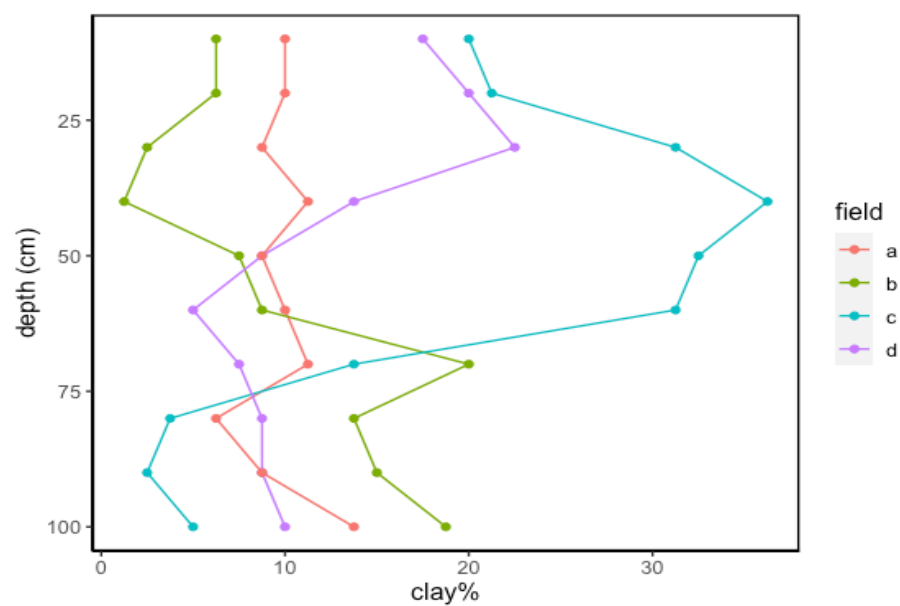

**Figure S4.** Clay size fraction percentage at each depth for each field.

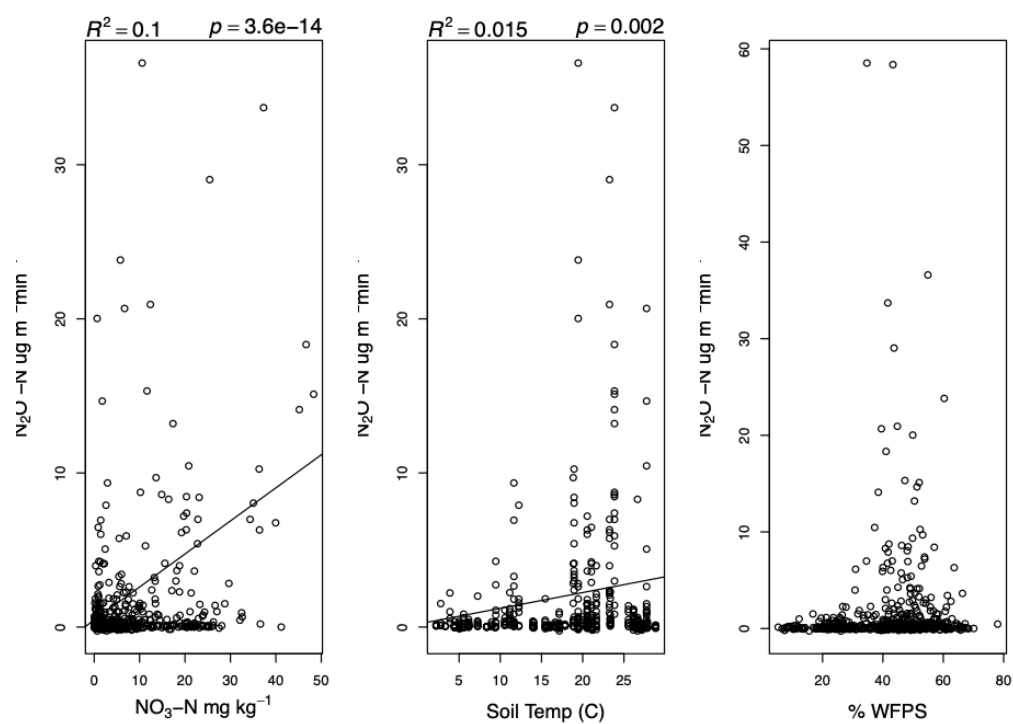

**Figure S5.** Three panels showing describing the individual relationships between  $\text{N}_2\text{O}$  gas fluxes and variables used in the multiple linear regression model. Linear regression p-values and  $r^2$  values reported at the top of each panel.

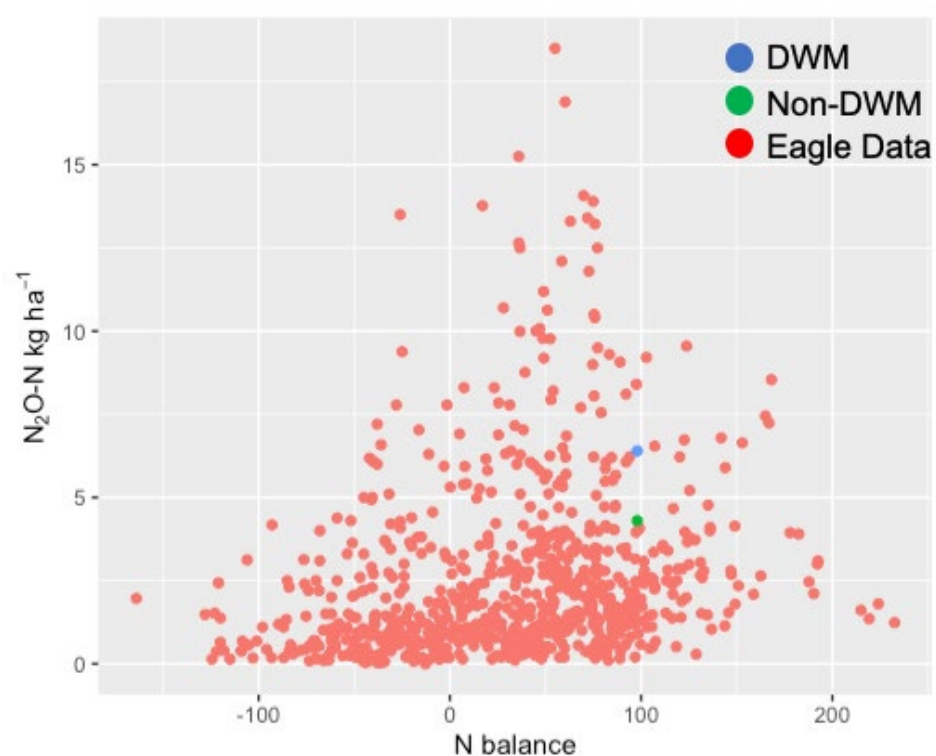

**Figure S6.** Comparison of study data to (61) review of studies from the U.S. cornbelt evaluating N balance versus N<sub>2</sub>O emissions.

## References

1. Verchot, L.V.; Davidson, E.; Cattanio, J.H.; Ackerman, I.L.; Erickson, H.E.; Keller, M. Land use change and biogeochemical controls of nitrogen oxide emissions from soils in eastern Amazonia. *Glob. Biogeochem. Cycles* **1999**, *13*, 31–46.
2. Courtois, E.A.; Stahl, C.; Burban, B.; Van den Berge, J.; Berveiller, D.; Bréchet, L.; Soong, J.L.; Arriga, N.; Peñuelas, J.; Janssens, I.A. Automatic high-frequency measurements of full soil greenhouse gas fluxes in a tropical forest. *Biogeosciences* **2019**, *16*, 785–796.
3. Christiansen, J.R.; Outhwaite, J.; Smukler, S.M. Comparison of CO<sub>2</sub>, CH<sub>4</sub> and N<sub>2</sub>O soil-atmosphere exchange measured in static chambers with cavity ring-down spectroscopy and gas chromatography. *Agric. For. Meteorol.* **2015**, *211*, 48–57.
4. Nickerson, N. *Evaluating Gas Emission Measurements using Minimum Detectable Flux (MDF)*; Eosense Inc.: Dartmouth, Canada, 2016.
